# Supplementary material for: The Four FAD-Dependent Histone Demethylases of Arabidopsis Are Differently Involved in the Control of Flowering Time
Source: PubMed Central journal article supplement (PMC6558185; doi:10.3389/fpls.2019.00669), 2019-06-04
Supplement: Table_1.pdf [file Table_1.pdf]

**Supplementary Table 1.** FAD-dependent lysine-specific histone demethylases used in phylogenetic analyses (NA:genomic sequences not available).

| Clade | Sequence code | Organism                        | Accession number | Number of introns | N-extension | SWIRM/AO distance | Tower domain | C-extension |
|-------|---------------|---------------------------------|------------------|-------------------|-------------|-------------------|--------------|-------------|
| Al    | a-AmLSD2      | <i>Ailuropoda melanoleuca</i>   | XP011226672.1    | 21                | 275         | 20                | absent       | 0           |
| Al    | a-CiLSD2      | <i>Ciona intestinalis</i>       | XP002121982.1    | 22                | 500         | 25                | absent       | 9           |
| Al    | a-DiLSD2      | <i>Delphinapterus leucas</i>    | XP022442447.1    | 23                | 277         | 20                | absent       | 0           |
| Al    | a-EcLSD2      | <i>Equus caballus</i>           | XP005603653.1    | 21                | 277         | 20                | absent       | 0           |
| Al    | a-EpLSD2      | <i>Exaiptasia pallida</i>       | KXJ14910.1       | 15                | 242         | 16                | absent       | 193         |
| Al    | a-GgLSD2      | <i>Gallus gallus</i>            | XP015131437.1    | 20                | 277         | 20                | absent       | 0           |
| Al    | a-HsLSD2      | <i>Homo sapiens</i>             | XP005248983.1    | 22                | 279         | 20                | absent       | 0           |
| Al    | a-LaLSD2      | <i>Loxodonta africana</i>       | XP003416501.1    | 24                | 277         | 20                | absent       | 0           |
| Al    | a-MfLSD2      | <i>Macaca fascicularis</i>      | XP005554000.1    | 21                | 279         | 20                | absent       | 0           |
| Al    | a-MdLSD2      | <i>Monodelphis domestica</i>    | XP007487955.1    | 21                | 279         | 20                | absent       | 0           |
| Al    | a-MmLSD2      | <i>Mus musculus</i>             | NP758466.1       | 20                | 285         | 22                | absent       | 0           |
| Al    | a-SsLSD2      | <i>Sus scrofa</i>               | XP001927879.1    | 21                | 277         | 20                | absent       | 0           |
| Al    | a-TgLSD2      | <i>Taeniopygia guttata</i>      | XP002190331.1    | 19                | 277         | 20                | absent       | 0           |
| Al    | a-TrLSD2      | <i>Takifugu rubripes</i>        | XP011618591.1    | 20                | 294         | 18                | absent       | 0           |
| Al    | a-TtLSD2      | <i>Tursiops truncatus</i>       | XP019800622.1    | 23                | 277         | 20                | absent       | 0           |
| Al    | a-XiLSD2      | <i>Xenopus laevis</i>           | XP018123297.1    | 20                | 278         | 20                | absent       | 0           |
| Al    | a-XtLSD2      | <i>Xenopus tropicalis</i>       | XP002932724.1    | 21                | 278         | 20                | absent       | 0           |
| All   | a-AmLSD1      | <i>Ailuropoda melanoleuca</i>   | XP019655525.1    | 20                | 116         | 16                | 97           | 24          |
| All   | a-CiLSD1      | <i>Ciona intestinalis</i>       | XP002131150.1    | 12                | 12          | 16                | 105          | 0           |
| All   | a-DiLSD1      | <i>Delphinapterus leucas</i>    | XP022407877.1    | 19                | 200         | 16                | 97           | 24          |
| All   | a-DmLSD1      | <i>Drosophila melanogaster</i>  | NP001262100.1    | 2                 | 162         | 17                | 104          | 0           |
| All   | a-EcLSD1      | <i>Equus caballus</i>           | XP014592758.1    | 19                | 74          | 16                | 97           | 24          |
| All   | a-GgLSD1      | <i>Gallus gallus</i>            | XP015153073.1    | 19                | 150         | 16                | 97           | 23          |
| All   | a-HsLSD1      | <i>Homo sapiens</i>             | NP055828.2       | 20                | 176         | 16                | 97           | 24          |
| All   | a-LaLSD1      | <i>Loxodonta africana</i>       | XP010593367.1    | 20                | 199         | 16                | 97           | 24          |
| All   | a-MfLSD1      | <i>Macaca fascicularis</i>      | XP005544551.1    | 21                | 96          | 16                | 97           | 24          |
| All   | a-MdLSD1      | <i>Monodelphis domestica</i>    | XP007491263.1    | 19                | 233         | 16                | 97           | 24          |
| All   | a-MmLSD1      | <i>Mus musculus</i>             | NP598633.2       | 22                | 177         | 16                | 97           | 24          |
| All   | a-SsLSD1      | <i>Sus scrofa</i>               | XP020948859.1    | 21                | 177         | 16                | 97           | 24          |
| All   | a-TgLSD1      | <i>Taeniopygia guttata</i>      | XP002194853.1    | 19                | 87          | 16                | 97           | 24          |
| All   | a-TcLSD1      | <i>Tribolium castaneum</i>      | XP008200898.1    | 6                 | 91          | 16                | 96           | 12          |
| All   | a-TcLSD1      | <i>Tribolium castaneum</i>      | XP008200898.1    | 6                 | 91          | 16                | 96           | 12          |
| All   | a-TtLSD1      | <i>Tursiops truncatus</i>       | XP019794105.1    | 19                | 197         | 16                | 97           | 24          |
| PI    | ch-OiLDL1     | <i>Ostreococcus lucimarinus</i> | XP001422439.1    | 1                 | 27          | 23                | absent       | 56          |
| PI    | ch-OtLDL1     | <i>Ostreococcus tauri</i>       | XP003084447      | 0                 | 99          | 37                | absent       | 57          |
| Pla   | p-AgLDL1      | <i>Aegilops tauschii</i>        | XP020171831.1    | 0                 | 139         | 21                | absent       | 0           |
| Pla   | p-AmtLDL1     | <i>Amborella trichopoda</i>     | XP006853193.1    | 0                 | 111         | 18                | absent       | 138         |
| Pla   | p-AtLDL1      | <i>Arabidopsis thaliana</i>     | NP176471.1       | 0                 | 162         | 21                | absent       | 138         |
| Pla   | p-BdLDL1      | <i>Brachypodium distachyon</i>  | XP003570612.2    | 0                 | 143         | 21                | absent       | 134         |
| Pla   | p-BrLDL1      | <i>Brassica rapa</i>            | XP009113042.1    | 0                 | 108         | 21                | absent       | 273         |
| Pla   | p-CsLDL1      | <i>Citrus sinensis</i>          | XP006473753.1    | 0                 | 124         | 21                | absent       | 130         |
| Pla   | p-EsLDL1      | <i>Eutrema salsugineum</i>      | XP006391816.1    | 1                 | 140         | 21                | absent       | 144         |
| Pla   | p-GmLDL1a     | <i>Glycine max</i>              | KRH39215.1       | 0                 | 141         | 22                | absent       | 142         |
| Pla   | p-GmLDL1b     | <i>Glycine max</i>              | XP006584188.1    | 0                 | 102         | 21                | absent       | 140         |
| Pla   | p-GhLDL1      | <i>Gossypium hirsutum</i>       | XP016687848.1    | 0                 | 110         | 44                | absent       | 125         |
| Pla   | p-MaLDL1a     | <i>Musa acuminata</i>           | XP009391311.1    | 1                 | 134         | 21                | absent       | 129         |
| Pla   | p-MaLDL1b     | <i>Musa acuminata</i>           | XP018673947.1    | 4                 | 127         | 23                | absent       | 129         |
| Pla   | p-NtLDL1a     | <i>Nicotiana tabacum</i>        | XP016470400.1    | 0                 | 151         | 21                | absent       | 117         |
| Pla   | p-NtLDL1b     | <i>Nicotiana tabacum</i>        | XP016484866.1    | 0                 | 151         | 21                | absent       | 122         |
| Pla   | p-OsLDL1      | <i>Oryza sativa</i>             | XP015623199.1    | 0                 | 167         | 21                | absent       | 134         |
| Pla   | p-PvLDL1      | <i>Phaseolus vulgaris</i>       | XP007152780.1    | 0                 | 99          | 21                | absent       | 141         |
| Pla   | p-PtLDL1      | <i>Populus trichocarpa</i>      | XP002300664.1    | 0                 | 122         | 21                | absent       | 130         |
| Pla   | p-PrLDL1      | <i>Prunus persica</i>           | XP007225269.1    | 0                 | 133         | 21                | absent       | 37          |
| Pla   | p-RcLDL1      | <i>Ricinus communis</i>         | XP002529806.1    | 0                 | 123         | 21                | absent       | 127         |
| Pla   | p-SiLDL1      | <i>Setaria italica</i>          | XP004953964.1    | 0                 | 161         | 21                | absent       | 157         |
| Pla   | p-SiLDL1      | <i>Solanum lycopersicum</i>     | XP010327494.1    | 0                 | 147         | 21                | absent       | 121         |
| Pla   | p-StLDL1      | <i>Solanum tuberosum</i>        | XP006359789.1    | 0                 | 147         | 21                | absent       | 121         |
| Pla   | p-SbLDL1      | <i>Sorghum bicolor</i>          | XP002452532.2    | 1                 | 160         | 21                | absent       | 142         |
| Pla   | p-TcLDL1      | <i>Theobroma cacao</i>          | EOY15211.1       | NA                | 110         | 21                | absent       | 130         |
| Pla   | p-VvLDL1      | <i>Vitis vinifera</i>           | XP002265069.1    | 1                 | 124         | 20                | absent       | 8           |
| Pla   | p-ZmLDL1      | <i>Zea mays</i>                 | XP008646288.1    | 0                 | 160         | 21                | absent       | 141         |
| Pla   | p-ZrLDL1      | <i>Zostera marina</i>           | KMZ68481.1       | NA                | 181         | 23                | absent       | 124         |
| Plb1  | p-AmtLDL2     | <i>Amborella trichopoda</i>     | XP006841765.1    | 3                 | 56          | 18                | absent       | 153         |
| Plb1  | p-AiLDL2      | <i>Arabidopsis lyrata</i>       | EFH61241.1       | 1                 | 58          | 18                | absent       | 143         |
| Plb1  | p-AtLDL2      | <i>Arabidopsis thaliana</i>     | NP187981.1       | 1                 | 59          | 19                | absent       | 150         |
| Plb1  | p-BdLDL2      | <i>Brachypodium distachyon</i>  | XP003573376.1    | 1                 | 65          | 21                | absent       | 167         |
| Plb1  | p-BrLDL2      | <i>Brassica rapa</i>            | XP009117559.1    | 1                 | 55          | 18                | absent       | 139         |
| Plb1  | p-CrLDL2      | <i>Capsella rubella</i>         | XP006297053.1    | 1                 | 60          | 18                | absent       | 138         |
| Plb1  | p-CsLDL2      | <i>Citrus sinensis</i>          | XP006464693.1    | 1                 | 62          | 18                | absent       | 146         |
| Plb1  | p-CusLDL2     | <i>Cucumis sativus</i>          | XP004150111.2    | 2                 | 61          | 18                | absent       | 269         |
| Plb1  | p-EsLDL2      | <i>Eutrema salsugineum</i>      | XP006407182.1    | 1                 | 140         | 17                | absent       | 147         |
| Plb1  | p-GmLDL2      | <i>Glycine max</i>              | XP003527270.1    | 2                 | 60          | 18                | absent       | 146         |
| Plb1  | p-HvLDL2      | <i>Hordeum vulgare</i>          | BAJ94616.1       | NA                | 69          | 21                | absent       | 157         |
| Plb1  | p-MtLDL2      | <i>Medicago truncatula</i>      | XP003600175.1    | 1                 | 59          | 17                | absent       | 153         |
| Plb1  | p-MaLDL2      | <i>Musa acuminata</i>           | XP009402613.1    | 1                 | 63          | 18                | absent       | 158         |
| Plb1  | p-NtLDL2a     | <i>Nicotiana tabacum</i>        | XP016461421.1    | 1                 | 61          | 18                | absent       | 167         |
| Plb1  | p-NtLDL2b     | <i>Nicotiana tabacum</i>        | XP016472582.1    | 1                 | 60          | 18                | absent       | 167         |
| Plb1  | p-OsLDL2      | <i>Oryza sativa</i>             | XP015650197.1    | 1                 | 61          | 21                | absent       | 165         |
| Plb1  | p-PvLDL2      | <i>Phaseolus vulgaris</i>       | XP007133132.1    | NA                | 60          | 18                | absent       | 0           |
| Plb1  | p-PtLDL2      | <i>Populus trichocarpa</i>      | XP002316929.2    | 2                 | 60          | 18                | absent       | 151         |
| Plb1  | p-PrLDL2      | <i>Prunus persica</i>           | XP007213630.1    | 1                 | 60          | 18                | absent       | 151         |
| Plb1  | p-RcLDL2      | <i>Ricinus communis</i>         | XP002533711.1    | 1                 | 60          | 18                | absent       | 153         |
| Plb1  | p-SiLDL2      | <i>Setaria italica</i>          | XP004972874.1    | 1                 | 65          | 25                | absent       | 164         |
| Plb1  | p-SiLDL2a     | <i>Solanum lycopersicum</i>     | XP010324354.1    | 4                 | 64          | 18                | absent       | 162         |
| Plb1  | p-SiLDL2b     | <i>Solanum lycopersicum</i>     | XP004244362.2    | 2                 | 64          | 18                | absent       | 158         |
| Plb1  | p-StLDL2      | <i>Solanum tuberosum</i>        | XP006360134.1    | 2                 | 64          | 18                | absent       | 162         |
| Plb1  | p-TcLDL2      | <i>Theobroma cacao</i>          | EOY12819.1       | NA                | 60          | 18                | absent       | 154         |
| Plb1  | p-VvLDL2      | <i>Vitis vinifera</i>           | XP002281860.3    | 1                 | 60          | 18                | absent       | 158         |
| Plb1  | p-ZmLDL2      | <i>Zea mays</i>                 | XP008662882.1    | 1                 | 62          | 21                | absent       | 163         |
| Plb2  | p-MpFLD       | <i>Marchantia polymorpha</i>    | BAS31072.1       | NA                | 113         | 18                | absent       | 161         |
| Plb2  | p-PpFLDa      | <i>Physcomitrella patens</i>    | XP001761354.1    | 1                 | 0           | 18                | absent       | 147         |

|      |           |                                   |               |    |         |     |        |      |
|------|-----------|-----------------------------------|---------------|----|---------|-----|--------|------|
| Plb2 | p-PpFLDb  | <i>Physcomitrella patens</i>      | XP001772025.1 | 1  | 0       | 18  | absent | 147  |
| Plb2 | p-SmFLD   | <i>Selaginella moellendorffii</i> | XP002981558.1 | 2  | 27      | 18  | absent | 157  |
| Plb2 | p-AmtFLD  | <i>Amborella trichopoda</i>       | XP011624439.1 | 5  | 125     | 18  | absent | 168  |
| Plb2 | p-AIFLD   | <i>Arabidopsis lyrata</i>         | XP002882665.2 | 4  | 84      | 19  | absent | 262  |
| Plb2 | p-AtFLD   | <i>Arabidopsis thaliana</i>       | NP001326314.1 | 3  | 90      | 18  | absent | 67   |
| Plb2 | p-BdFLD   | <i>Brachypodium distachyon</i>    | KQJ84025.1    | 4  | 90      | 19  | absent | 181  |
| Plb2 | p-BnFLD   | <i>Brassica napus</i>             | XP013736108.1 | 4  | 108     | 21  | absent | 250  |
| Plb2 | p-BrFLD   | <i>Brassica rapa</i>              | XP009135110.1 | 4  | 140     | 26  | absent | 9    |
| Plb2 | p-CrFLD   | <i>Capsella rubella</i>           | XP006299707.1 | 4  | 77      | 19  | absent | 260  |
| Plb2 | p-EsFLD   | <i>Eutrema salsugineum</i>        | XP006407575.1 | 4  | 137     | 18  | absent | 251  |
| Plb2 | p-GmFLD   | <i>Glycine max</i>                | XP003520261.1 | 5  | 95      | 18  | absent | 231  |
| Plb2 | p-GhFLDa  | <i>Gossypium hirsutum</i>         | XP016748405.1 | 5  | 132     | 18  | absent | 224  |
| Plb2 | p-GhFLDb  | <i>Gossypium hirsutum</i>         | XP016698330.1 | 4  | 141     | 18  | absent | 204  |
| Plb2 | p-GhFLDc  | <i>Gossypium hirsutum</i>         | XP016731673.1 | 5  | 138     | 18  | absent | 234  |
| Plb2 | p-HvFLD   | <i>Hordeum vulgare</i>            | BAK05575.1    | NA | 84      | 19  | absent | 179  |
| Plb2 | p-MaFLD   | <i>Musa acuminata</i>             | XP009398021.1 | 2  | 119     | 18  | absent | 157  |
| Plb2 | p-OsFLD   | <i>Oryza sativa</i>               | BAS90468.1    | 4  | 96      | 19  | absent | 175  |
| Plb2 | p-PtFLDa  | <i>Populus trichocarpa</i>        | XP002315324.2 | 5  | partial | 18  | absent | 123  |
| Plb2 | p-PtFLDb  | <i>Populus trichocarpa</i>        | XP002311993.1 | 7  | 0       | 18  | absent | 325  |
| Plb2 | p-PrFLD   | <i>Prunus persica</i>             | XP020413288.1 | 5  | 132     | 18  | absent | 235  |
| Plb2 | p-RcFLD   | <i>Ricinus communis</i>           | EEF32788.1    | 4  | 123     | 18  | absent | 297  |
| Plb2 | p-SiFLD   | <i>Setaria italica</i>            | KQK98441.1    | NA | 91      | 18  | absent | 177  |
| Plb2 | p-SIFLDa  | <i>Solanum lycopersicum</i>       | XP004240184.1 | 7  | 87      | 18  | absent | 13   |
| Plb2 | p-SIFLDb  | <i>Solanum lycopersicum</i>       | XP004250050.1 | 5  | 135     | 18  | absent | 331  |
| Plb2 | p-StFLD   | <i>Solanum tuberosum</i>          | XP006361683.1 | 5  | 127     | 18  | absent | 332  |
| Plb2 | p-SbFLD   | <i>Sorgum bicolor</i>             | EES12649.1    | 4  | 91      | 19  | absent | 177  |
| Plb2 | p-VvFLD   | <i>Vitis vinifera</i>             | XP010658356.1 | 8  | 161     | 18  | absent | 327  |
| Plb2 | p-ZmFLD   | <i>Zea mays</i>                   | NP001148070.1 | 1  | 91      | 19  | absent | 177  |
| Plb2 | p-ZrFLD   | <i>Zostera marina</i>             | KMZ63260.1    | NA | 151     | 18  | absent | 175  |
| Pll  | p-AgLDL3  | <i>Aegilops tauschii</i>          | XP020158261.1 | 7  | 552     | 148 | 43     | 568  |
| Pll  | p-AmtLDL3 | <i>Amborella trichopoda</i>       | XP011627240.1 | 8  | 781     | 168 | 50     | 2117 |
| Pll  | p-AILDL3  | <i>Arabidopsis lyrata</i>         | XP020873959.1 | 9  | 420     | 150 | 33     | 524  |
| Pll  | p-AtLDL3  | <i>Arabidopsis thaliana</i>       | NP193364.5    | 10 | 380     | 150 | 33     | 524  |
| Pll  | p-BdLDL3  | <i>Brachypodium distachyon</i>    | XP010234776.1 | 8  | 509     | 147 | 43     | 574  |
| Pll  | p-BnLDL3  | <i>Brassica napus</i>             | CAB98166.1    | 9  | 343     | 150 | 37     | 187  |
| Pll  | p-BrLDL3  | <i>Brassica rapa</i>              | XP009124513.1 | 9  | 337     | 150 | 37     | 524  |
| Pll  | p-CrLDL3  | <i>Capsella rubella</i>           | XP006282993.1 | 12 | 386     | 150 | 37     | 524  |
| Pll  | p-CsLDL3  | <i>Citrus sinensis</i>            | XP015384328.1 | 13 | 659     | 165 | 37     | 561  |
| Pll  | p-CusLDL3 | <i>Cucumis sativus</i>            | XP004152762.1 | 8  | 633     | 149 | 10     | 575  |
| Pll  | p-EsLDL3  | <i>Eutrema salsugineum</i>        | XP006414367.1 | 13 | 393     | 151 | 36     | 526  |
| Pll  | p-GmLDL3a | <i>Glycine max</i>                | XP014622663.1 | 8  | 584     | 152 | 33     | 588  |
| Pll  | p-GmLDL3b | <i>Glycine max</i>                | XP014625205.1 | 10 | 595     | 152 | 33     | 588  |
| Pll  | p-GhLDL3a | <i>Gossypium hirsutum</i>         | XP016751424.1 | 8  | 529     | 170 | 33     | 533  |
| Pll  | p-GhLDL3b | <i>Gossypium hirsutum</i>         | XP016666958.1 | 8  | 487     | 162 | 38     | 534  |
| Pll  | p-GhLDL3c | <i>Gossypium hirsutum</i>         | XP016694175.1 | 8  | 487     | 162 | 38     | 539  |
| Pll  | p-MtLDL3a | <i>Medicago truncatula</i>        | XP003589373.1 | 11 | 628     | 149 | 33     | 588  |
| Pll  | p-MtLDL3b | <i>Medicago truncatula</i>        | XP013462192.1 | 9  | 647     | 146 | 16     | 717  |
| Pll  | p-MaLDL3  | <i>Musa acuminata</i>             | XP009389314.1 | 14 | 839     | 148 | 43     | 580  |
| Pll  | p-NtLDL3  | <i>Nicotiana tabacum</i>          | XP016436973.1 | 5  | 679     | 187 | 38     | 541  |
| Pll  | p-OsLDL3  | <i>Oryza sativa</i>               | XP015614418.1 | 8  | 519     | 158 | 39     | 575  |
| Pll  | ch-OILDL3 | <i>Ostreococcus lucimarinus</i>   | XP001416705.1 | 0  | 44      | 117 | 24     | 473  |
| Pll  | ch-OtLDL3 | <i>Ostreococcus tauris</i>        | XP022838542.1 | 0  | 46      | 105 | 8      | 1506 |
| Pll  | p-PpLDL3  | <i>Physcomitrella patens</i>      | XP001776061.1 | 19 | 451     | 264 | 94     | 618  |
| Pll  | p-PtLDL3a | <i>Populus trichocarpa</i>        | XP002307701.2 | 11 | 618     | 165 | 37     | 308  |
| Pll  | p-PtLDL3b | <i>Populus trichocarpa</i>        | XP002300727.2 | 8  | 610     | 171 | 38     | 295  |
| Pll  | p-PrLDL3  | <i>Prunus persica</i>             | XP007225485.1 | 7  | 580     | 169 | 15     | 578  |
| Pll  | p-RcLDL3  | <i>Ricinus communis</i>           | EEF52674.1    | 7  | 685     | 122 | 37     | 562  |
| Pll  | p-SmLDL3  | <i>Selaginella moellendorffii</i> | XP002993151.1 | 15 | 137     | 66  | 47     | 503  |
| Pll  | p-SiLDL3  | <i>Setaria italica</i>            | XP004983837.1 | 9  | 467     | 161 | 43     | 564  |
| Pll  | p-SILDL3  | <i>Solanum lycopersicum</i>       | XP004238616.1 | 11 | 729     | 187 | 38     | 583  |
| Pll  | p-StLDL3  | <i>Solanum tuberosum</i>          | XP006342013.1 | 9  | 730     | 187 | 38     | 583  |
| Pll  | p-SbLDL3  | <i>Sorgum bicolor</i>             | XP002467596.1 | 9  | 477     | 167 | 43     | 571  |
| Pll  | p-TcLDL3  | <i>Theobroma cacao</i>            | EOY14931.1    | NA | 647     | 170 | 39     | 531  |
| Pll  | p-TuLDL3  | <i>Triticum urartu</i>            | EMS56268.1    | NA | 498     | 148 | 43     | 647  |
| Pll  | p-VvLDL3  | <i>Vitis vinifera</i>             | XP010664765.1 | 9  | 795     | 164 | 39     | 587  |
| Pll  | p-ZmLDL3  | <i>Zea mays</i>                   | XP008657823.1 | 8  | 475     | 167 | 43     | 577  |
| -    | f-Sw1     | <i>Schizosaccharomyces pombe</i>  | NP595398.1    | 0  | 155     | 19  | 21     | 243  |
| -    | f-Sw2     | <i>Schizosaccharomyces pombe</i>  | NP592937.1    | 2  | 396     | 27  | 37     | 236  |
| -    | p-AtPAO1  | <i>Arabidopsis thaliana</i>       | NP196874.1    |    |         |     |        |      |
