# Supplementary material for: The Four FAD-Dependent Histone Demethylases of Arabidopsis Are Differently Involved in the Control of Flowering Time
Source: PubMed Central journal article supplement (PMC6558185; doi:10.3389/fpls.2019.00669), 2019-06-04
Supplement: Table_2.pdf [file Table_2.pdf]

**Supplementary Table 2. List of primers used in the present study.** The sequence of all primers is shown from 5' end to 3' end.

| <b>Preparation of constructs for <i>LDL/FLD::GFP-GUS</i> transgenic plants</b>   |                                                                      |
|----------------------------------------------------------------------------------|----------------------------------------------------------------------|
| <i>PromLDL1-F</i>                                                                | GGGGACAAGTTTGTACAAAAAAGCAGGCTGGGTCTTG<br>ATGTCTCCACTACCTGCAG         |
| <i>PromtLDL1-R</i>                                                               | GGGGACCACTTTGTACAAGAAAGCTGGGTAGCTCTAGC<br>TCTGTGTGTGATGATGTGAGTG     |
| <i>PromLDL2-F</i>                                                                | GGGGACAAGTTTGTACAAAAAAGCAGGCTACTAGTCT<br>CTCTTTGCTTCTGTGTGTGCTTTGTAG |
| <i>PromLDL2-R</i>                                                                | GGGGACCACTTTGTACAAGAAAGCTGGGTTTCTGGTCA<br>ATTAAGTCACCAAAATCACCTCC    |
| <i>PromFLD3-F</i>                                                                | GGGGACAAGTTTGTACAAAAAAGCAGGCTGAAGAATA<br>CACTGAAGGGAAAGGATG          |
| <i>PromFLD3-R</i>                                                                | GGGGACCACTTTGTACAAGAAAGCTGGGTCTGCTCAA<br>ACTAGGGTTAGAGATTG           |
| <i>PromLDL3-F</i>                                                                | GGGGACAAGTTTGTACAAAAAAGCAGGCTTTCACCAT<br>CCAAC TTCCCATTTTC           |
| <i>PromLDL3-R</i>                                                                | GGGGACCACTTTGTACAAGAAAGCTGGGTACCTATCTA<br>CTTATTCCCTTACACC           |
| <b>Genomic characterization of Arabidopsis <i>ldl/fld</i> mutants</b>            |                                                                      |
| <i>LDL1-LP</i>                                                                   | CCCAGCTTTTCTCAAGAAACCGCCG                                            |
| <i>LDL1-RP</i>                                                                   | GATGATGACGCTCTTCTTCTAGCAACTCTAAG                                     |
| <i>LDL2-LP</i>                                                                   | GATTACTGCGAAGATAATTCGCAACATGTAG                                      |
| <i>LDL2-RP</i>                                                                   | GTTTGCTCCTTATATTCCTGAAGAGGGTACT                                      |
| <i>FLD-LP</i>                                                                    | CTTATGCCTCGGGCCTTTTGCAGATTGAGC                                       |
| <i>FLD-RP</i>                                                                    | GCACCAAAGAAACGAAGGAGAGGACG                                           |
| <i>LDL3-LP</i>                                                                   | CCCTCGGAAATTTTCATCTTCGCAGG                                           |
| <i>LDL3-RP</i>                                                                   | GACGATGATGCTGATGATGATGAACC                                           |
| <i>Lbbl</i>                                                                      | GCGTGGACCGCTTGTGCAACT                                                |
| <i>Lba1</i>                                                                      | GATGGTTCACGTAGTGGGCCATCGC                                            |
| <i>Lb3sail</i>                                                                   | GAATTCATAACCAATCTCGATAC                                              |
| <b>Characterization of <i>ldl/fld</i> Arabidopsis mutants by RT-PCR analysis</b> |                                                                      |
| <i>LDL1-F</i>                                                                    | CAACAGAGACTAAAGAAACCCGACC                                            |
| <i>LDL1-R</i>                                                                    | CGGCGGTTTCTTGAGAAAGCTGGG                                             |
| <i>LDL2-F</i>                                                                    | CCGAGGAGGAACAGGAG AAAAGTAAG                                          |
| <i>LDL2-R</i>                                                                    | AGTACCCTTTCAGGAATATAAGGAGCAA                                         |
| <i>FLD-F</i>                                                                     | GCACCAAAGAAACGAAGGAGAGGACG                                           |
| <i>FLD-R</i>                                                                     | GCCGAATCTAAGAGACTACTACAATGTTTAGGAATC                                 |
| <i>LDL3-F</i>                                                                    | CAGCGCCAGGGTTTTTCTGTAAAC                                             |
| <i>LDL3-R</i>                                                                    | TCTCAGCCGTTGAAGGCCATATTCT                                            |
| <i>UBQ5-F</i>                                                                    | GGAAGAAGAAGACTTACACC                                                 |
| <i>UBQ5-R</i>                                                                    | AGTCCACACTTACCACAGTA                                                 |
| <b>qRT-PCR primers</b>                                                           |                                                                      |
| <i>LDL1-F</i>                                                                    | AGCTGCAAGACTGAATCGACA                                                |
| <i>LDL1-R</i>                                                                    | ACAACGTAGACGCAGCTGAA                                                 |
| <i>LDL2-F</i>                                                                    | GCCTGCCTTGGTTGCCTTA                                                  |

**Supplementary Table 2. (Continued)**

|                 |                            |
|-----------------|----------------------------|
| <i>LDL2-R</i>   | GGGTCAGGCACAACAACACCT      |
| <i>FLD-F</i>    | ACTGGTCGCAAGCTACCATCA      |
| <i>FLD-R</i>    | AATCCTTCTGATCATCTTCCGCTT   |
| <i>LDL3-F</i>   | TGGATCCTGGATTTCGATGGGT     |
| <i>LDL3-R</i>   | CCTCAAGGCAAAGAGGTCACCT     |
| <i>FLC-F</i>    | CCGAACCTCATGTTGAAGCTTGTGAG |
| <i>FLC-R</i>    | GTCGGAGATTTGTCCAGCAGGTGAC  |
| <i>FWA-F</i>    | GAAATTAGTCCAGGATGTCTGC     |
| <i>FWA-R</i>    | TGAATTTTCTGCCACTTGTC       |
| <i>MAF1-F</i>   | GGATCAGTGTTGTACCTCCTTCG    |
| <i>MAF1-R</i>   | TCCAATCCGTACATTGAGACAC     |
| <i>MAF2/3-F</i> | CTCGCGCCAATGTGGAAAT        |
| <i>MAF2-R</i>   | AATTCTTTCGCATGAGCTTCTG     |
| <i>MAF3-R</i>   | AGGTACAACAAAGATCGGTAGCTT   |
| <i>MAF4-F</i>   | TGATTTGTAGTTCATAAGGAAAGC   |
| <i>MAF4-R</i>   | TTGATGCATCTCCTTGGATGAC     |
| <i>UBC21-F</i>  | CTGCGACTCAGGGAATCTTCTAA    |
| <i>UBC21-R</i>  | TTGTGCCATTGAATTGAACCC      |
